# Supplementary figures and images for: A quantitative approach to evaluating the GWP timescale through implicit discount rates
Source: Copernicus journal article supplement (doi:10.5194/esd-2018-6), 2018-02-06

# CH<sub>4</sub> damage ratio

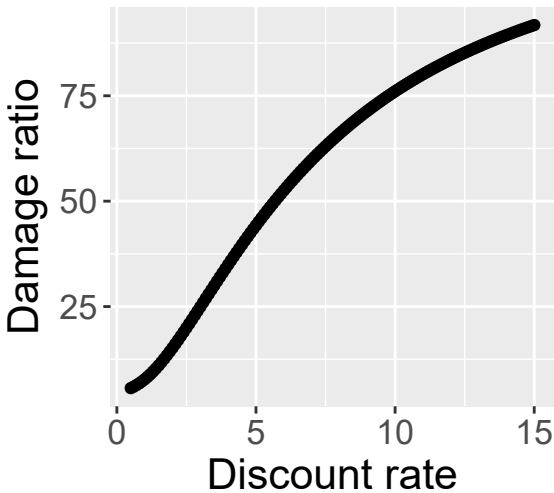

Supplement: Supplementary file 2 [file esd-2018-6-supplement.zip]

# N<sub>2</sub>O GWP

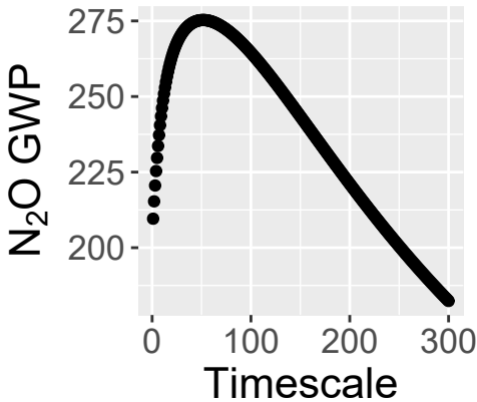

Supplement: Supplementary file 3 [file esd-2018-6-supplement.zip]

# $\text{N}_2\text{O}$ damage ratio

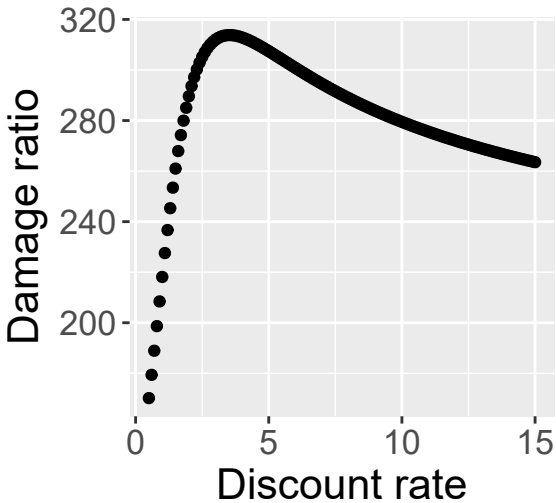

Supplement: Supplementary file 4 [file esd-2018-6-supplement.zip]

(a) Radiative forcing

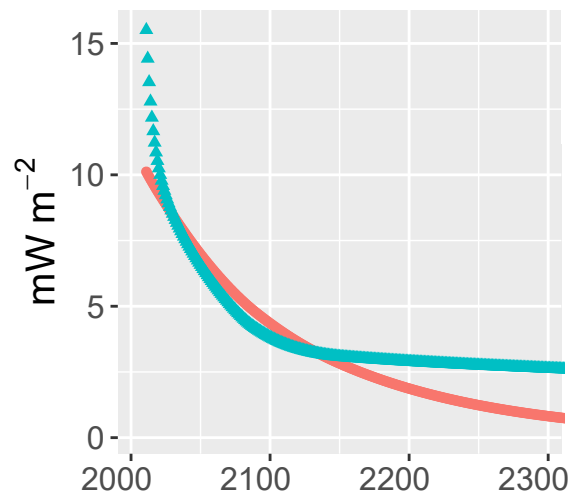

(b) Temperature

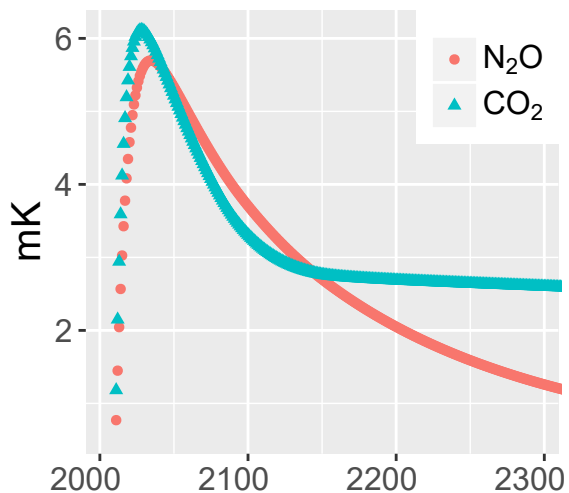

(c) Damages

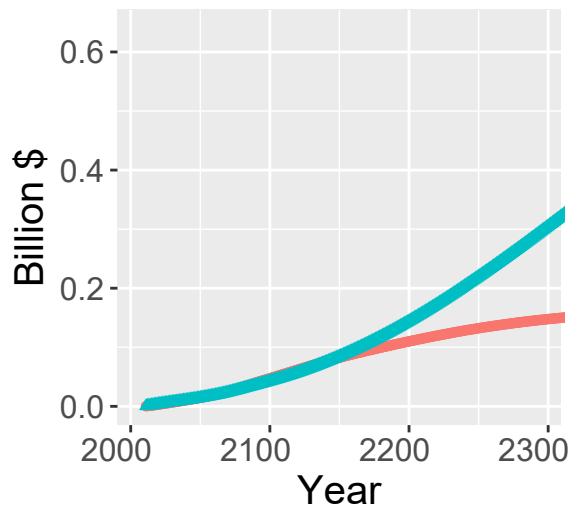

(d) Discounted

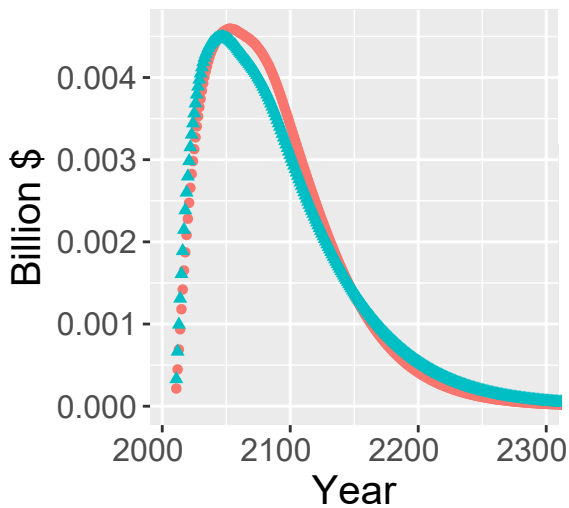

Supplement: Supplementary file 5 [file esd-2018-6-supplement.zip]

# GWP and damage ratio

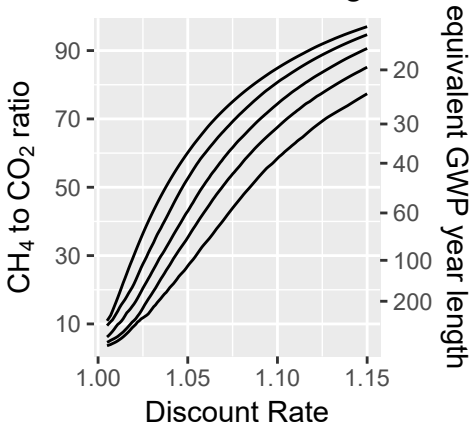

Supplement: Supplementary file 6 [file esd-2018-6-supplement.zip]

(a) Radiative forcing

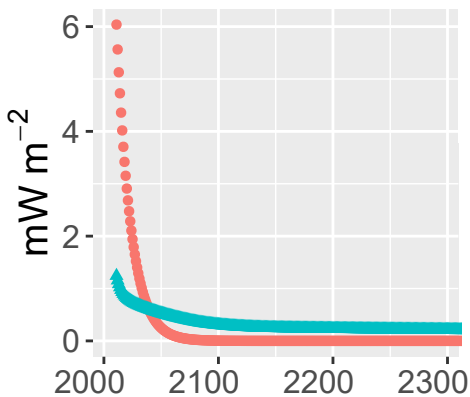

(b) Temperature

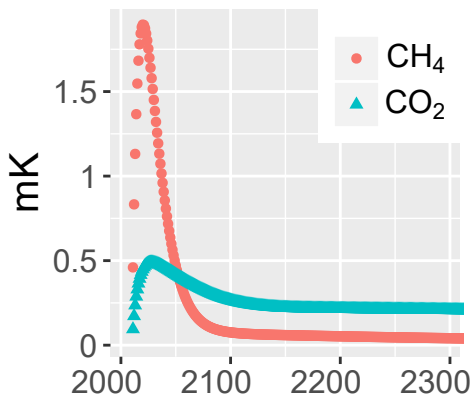

(c) Damages

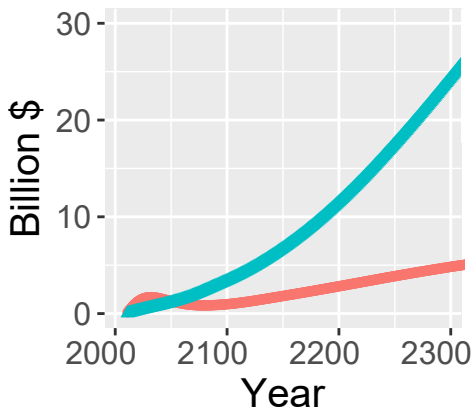

(d) Discounted

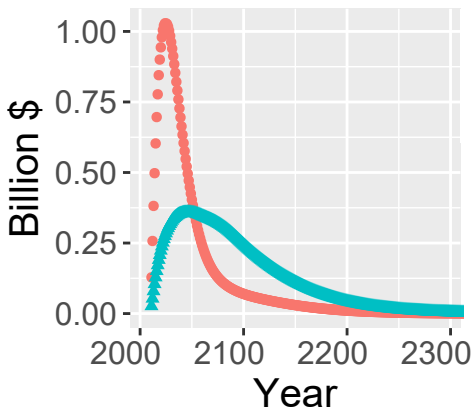

Supplement: Supplementary file 7 [file esd-2018-6-supplement.zip]

equivalent GWP by disc

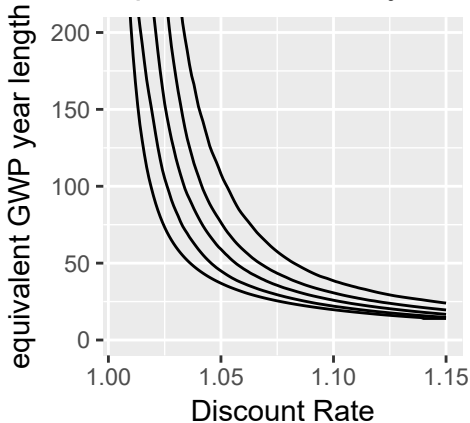

Supplement: Supplementary file 8 [file esd-2018-6-supplement.zip]

# CH<sub>4</sub> GWP

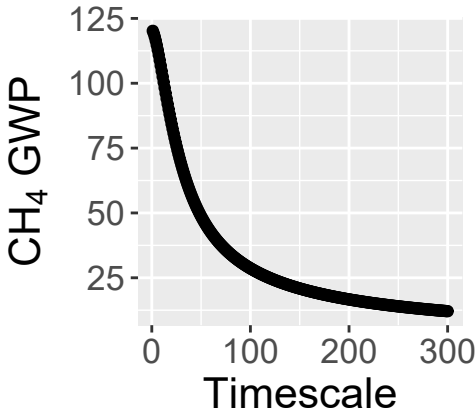

Supplement: Supplementary file 9 [file esd-2018-6-supplement.zip]
